# Supplementary material for: VRK2 promotes HCC metastasis through stabilizing ATG5 to activate autophagy-mediated degradation of ZO-1
Source: Research Square preprint supplement (doi:10.21203/rs.3.rs-6357129/v1), 2025-06-05
Supplement: Supplementary file 1 [file d10f7e1e4763b766b847d946.docx]

**1. High VRK2 expression correlates with the poor prognosis of HCC.**

A. VRK2 expression in HCC patient specimens (n = 369) and liver non-tumour tissues (n = 160) analyzed by the GEPIA web tool. *p < 0.05. B and C. The overall survival time and the disease-free survival time of HCC patients with low vs. high VRK2 expression. D and E. Representative images and quantification of VRK2 expression analyzed by IHC in human HCC tissues and adjacent normal tissues, for 4× figures, the scale bar indicates 500 μm; For 20× figures, the scale bar indicates 100 μm, **p < 0.01. F. Western blotting analysis of VRK2 expression in human HCC tissues (n = 10) and adjacent normal tissues (n = 10). G and H. Kaplan–Meier analysis of overall survival curves and disease-free survival curves of HCC patients with different expression of VRK2.

**2. VRK2 accelerates HCC cells invasion and migration in vitro and in vivo.**

A. VRK2 knockdown in Hep 3B and HuH-7 was validated by Western blotting. B-D, The invasion and migration abilities of HCC transfected with shVRK2 were tested by real-time cellular analysis, transwell migration and invasion assays; scale bar indicates 50 μm. n = 3; ***p < 0.001. E. Mice injected with luciferase-expressing Hep 3B/shNC or Hep 3B /shVRK2 cells were assessed by IVIS imaging system. F. Number of lung metastatic nodules in the Hep 3B/shNC or Hep 3B /shVRK2 groups; n = 10; ***p < 0.001. G and H. Area of metastatic foci（%）in the shNC and shVRK2 groups, scale bar indicates 50 μm. n = 10; **p < 0.01.

**3. VRK2 regulates ZO-1 protein expression and promotes HCC cells proliferation.**

A. Biological pathway analyses of the differentially expressed proteins in Hep G2 cells transfected with overNC or overVRK2. B. Heatmap showing the top 20 most differentially expressed genes in overNC or overVRK2 of Hep G2 cells. C. The expression of VRK2 and ZO-1 in L-O2, Li-7, HuH-7, Hep 3B, Hep G2, SK-HEP-1 and MHCC97H cells analyzed by Western blotting, **p < 0.01. D and E. Immunoblot and RT-qPCR for protein and mRNA expression of VRK2 and ZO-1 in shNC or shVRK2 transfected in Hep 3B and HuH-7 cells. F. VRK2 and ZO-1 protein expression in Hep 3B cells expressing shNC or shVRK2, with or without shZO-1. G and H. transwell migration and invasion assays analyses for cell metastasis in Hep 3B cells expressing shNC or shVRK2, with or without shZO-1, ***p < 0.001. I and J. Number of lung metastatic nodules and area of metastatic foci（%）in Hep 3B cells expressing shNC or shVRK2, with or without shZO-1, n = 10; ***p < 0.001.

**4. VRK2 accelerates autophagy-mediated degradation of ZO-1.**

A. Hep 3B cells treated with autophagy inhibitor 3-MA (5 mM) or CQ(2μM), Immunoblot detect the protein expression of ZO-1 and autophagy markers. B and C. Hep G2 cells treated with hungry or rapamycin (50 nM) to active autophagy, Immunoblot detect the protein expression of ZO-1 and autophagy markers. D and E. Co-immunoprecipitation and immunofluorescence revealed the connection of ZO-1 and LC3 in Hep G2 and Hep 3B cells, scale bar indicates 20 μm. F. Hep G2 cells were transfected with Flag-Vetor, Flag-VRK2 and sh-VRK2 followed by CHX(20 μg/ml) treatment. The cells were collected and subjected to western blotting analysis. The amounts of lysates from the control vector, Flag-VRK2 or sh-VRK2 transfected Hep G2 cells were adjusted to achieve similar levels of ZO-1 at 0 h. n = 3; NS, no significant. *p < 0.05. G and H. Hep G2 cells were treated with or without 3-MA (5 mM) and Bafilomycin A1 (100 nM). Cells were harvested and analyzed by immunoblotting.

**5. The ser106 site phosphorylation of ATG5 is necessary for VRK2 regulate the expression of ATG5 and activate autophagy.**

A. VRK2 knockdown in Hep 3B cells and Western blotting detect the changes of autophagy marker. B. Live-cell fluorescence revealed the changes of autophagy when VRK2 knockdown in Hep 3B cells; scale bar indicates 20 μm, **p < 0.01. C. electron microscopy revealed the changes of autophagy when VRK2 knockdown in Hep 3B cells; Low field ×2500, scale bar, 2μm; high field ×12000, scale bar, 0.5μm, **p < 0.01. D. Phosphorylation mass spectrometry showed the phosphorylate site of ATG5 when VRK2 overexpressed in Hep G2 cells. E. The expression of ATG5 protein in Hep G2 cells transfected with Flag-VRK2 or Flag-VRK2 K61A. F and G. VRK2 phosphorylates AGT5 at the ser106 site in vivo and vitro. H. The interaction of ZO-1 and USP13 was detected by immunoprecipitation in control vector or exogenous VRK2 transfected Hep G2 cells. I. The interaction of ZO-1 and USP13 was detected by immunoprecipitation in shNC or shVRK2 transfected Hep 3B cells. J. The expression of Ubiquitinated-ATG5 protein in Hep G2 cells transfected with Flag-VRK2 or Flag-VRK2 K61A.

**6. Clinical HCC tissues validated the regulation of VRK2 on autophagy and ZO-1.**

A-E. Determination and quantification of VRK2, ATG5, LC3 and ZO-1 protein levels in HCC tissues and paired normal tissues by western blotting assay. Tubulin was used as a loading control. ***P<0.001. F. The protein expression relationship of VRK2 and ATG5, P<0.001. G. The protein expression relationship of VRK2 and ZO-1, P<0.001. H. The protein expression relationship of LC3-II/LC3-I ratio and ZO-1, P<0.05. I. Representative images of IHC staining of VRK2, ATG5, LC3 and ZO-1 in clinical HCC samples. For 4× figures, the scale bar indicates 500 μm; For 20× figures, the scale bar indicates 100 μm.


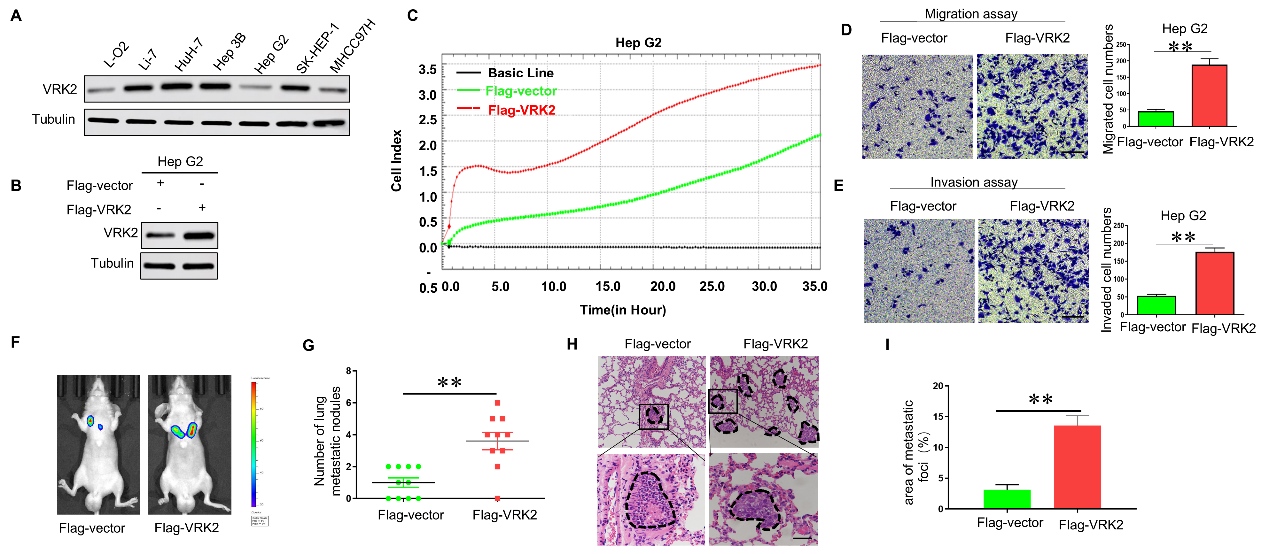


**Supplementary Fig.1. VRK2 accelerates HCC cells invasion and migration in vitro and in vivo.**

A. The expression of VRK2 in L-O2, Li-7, HuH-7, Hep 3B, Hep G2, SK-HEP-1 and MHCC97H cells analyzed by Western blotting. B. VRK2 overexpression was validated by Western blotting in Hep G2 cells. C-E. The invasion and migration abilities of Hep G2 cells transfected with overVRK2 were tested by real-time cellular analysis, transwell migration and invasion assays; scale bar indicates 50 μm. n = 3; **p < 0.01. F. Mice injected with luciferase-expressing Hep G2/Flag-vector or Hep G2 /Flag-VRK2 cells were assessed by IVIS imaging system. G. Number of lung metastatic nodules in the Hep G2/Flag-vector or Hep G2 /Flag-VRK2 groups; n = 10; **p < 0.01. H and I. Area of metastatic foci（%）in the Hep G2/Flag-vector or Hep G2 /Flag-VRK2 groups, scale bar indicates 50 μm. n = 10; **p < 0.01.


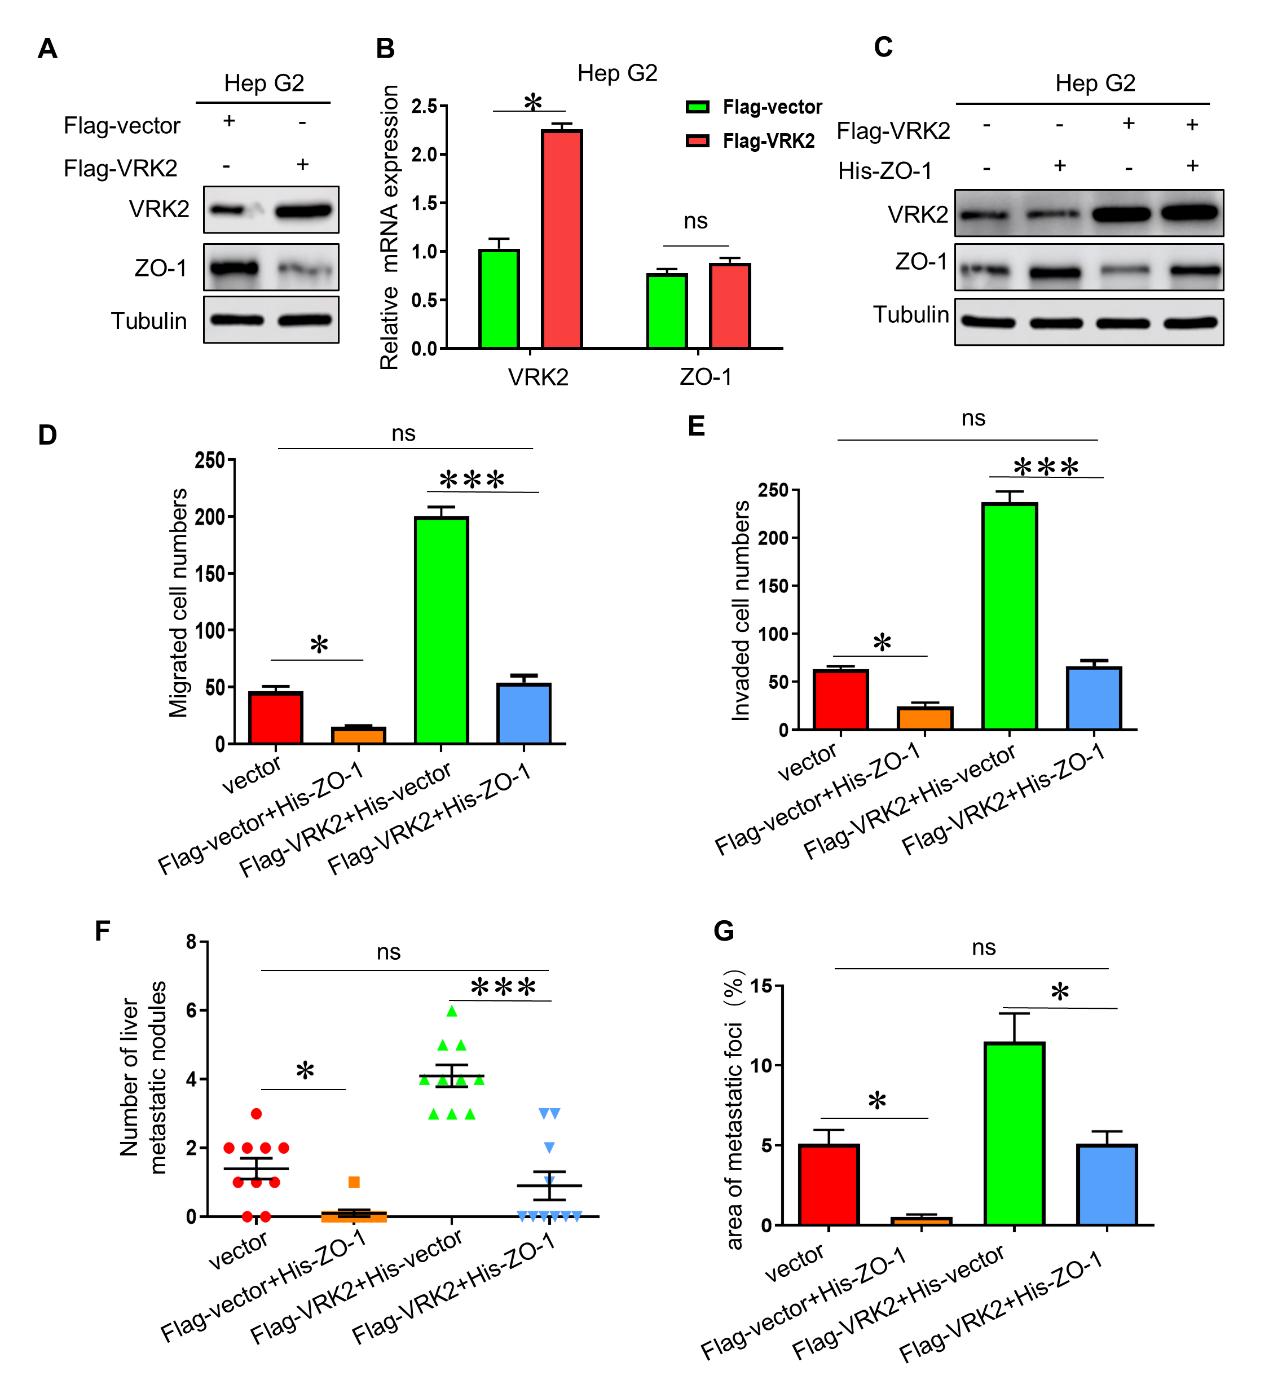


**Supplementary Fig.2. VRK2 regulates ZO-1 protein expression and promotes HCC cells proliferation.**

A and B. Immunoblot and RT-qPCR for protein and mRNA expression of VRK2 and ZO-1 in Flag-vector or Flag-VRK2 transfected in Hep G2 cells. C. VRK2 and ZO-1 protein expression in Hep G2 cells expressing Flag-vector or Flag-VRK2, with or without overZO-1. D and E. transwell migration and invasion assays analyses for cell metastasis in Hep G2 cells expressing Flag-vector or Flag-VRK2, with or without overZO-1, ***p < 0.001. G and H. Number of lung metastatic nodules and area of metastatic foci（%）in Hep G2 cells expressing Flag-vector or Flag-VRK2, with or without overZO-1, n = 10; *p < 0.05, ***p < 0.001.


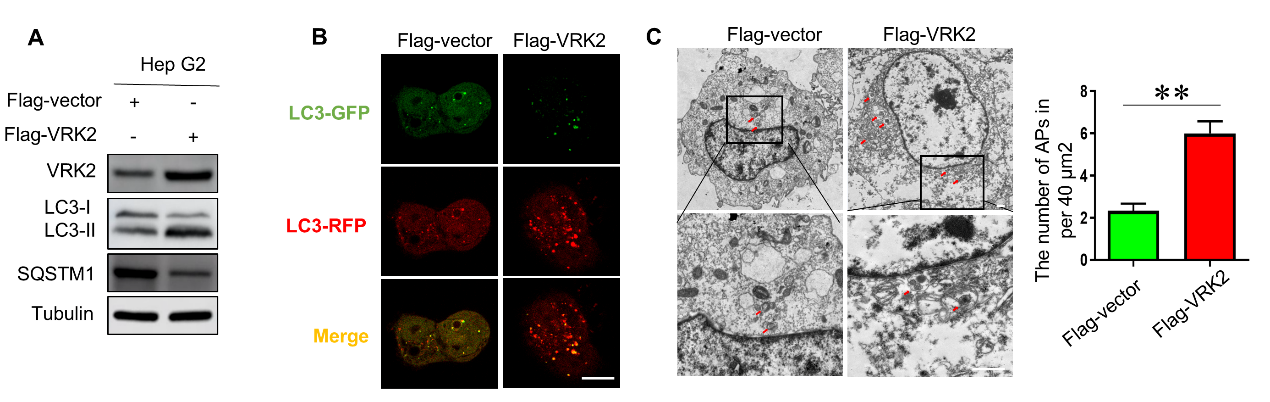


**Supplementary Fig.3. The ser106 site phosphorylation of ATG5 is necessary for VRK2 regulate the expression of ATG5 and activate autophagy.**

A. VRK2 overexpression in Hep G2 cells and Western blotting detect the changes of autophagy marker. B. Live-cell fluorescence revealed the changes of autophagy when VRK2 overexpression in Hep G2 cells; scale bar indicates 20 μm, **p < 0.01. C. electron microscopy revealed the changes of autophagy when VRK2 overexpression in Hep G2 cells; Low field ×2500, scale bar, 2μm; high field ×12000, scale bar, 0.5μm, **p < 0.01.
